# Supplementary material for: Measurement report: Lessons learned from the comparison and combination of fine carbonaceous aerosol source apportionment at two locations in the city of Strasbourg, France
Source: Copernicus journal article supplement (doi:10.5194/egusphere-2025-648), 2025-06-05
Supplement: Supplementary file [file egusphere-2025-648-AC1-supplement.pdf]

# Response to the reviewers on EGUSPHERE-2025-648

## “Measurement report: Lessons learned from the comparison and combination of fine carbonaceous aerosol source apportionment at two locations in the city of Strasbourg, France”

We thank the editor and the reviewers for their constructive advice and comments on our manuscript. In the following, we respond to all reviewers' comments using a black font for original review comments, green font for authors' responses, and blue font for changes in the revised version.

### #Referee 2

Chebaicheb et al. present a comparison of aerosol composition/concentration and positive matrix factorization (PMF) results from two quadrupole aerosol chemical speciation monitors (Q-ACSMs) that were stationed at two locations within Strasbourg, France, during a winter period in 2019/2020. The authors found that the Clemenceau site generally had, on average, higher PM<sub>1</sub> than the Danube site due to differences in emissions; however, the composition between the two sites were generally similar (e.g., organics, sulfate, nitrate, ammonium, fossil fuel black carbon, and wood burning biomass burning). Running PMF with the dataset collected from each instrument similarly showed similar organic composition, with the largest difference in the hydrocarbon-like organic aerosol (HOA) at Danube vs Clemenceau. However, if PMF was conducted with the dataset with both instruments as one large dataset, large differences in the organic components occur between Danube than Clemenceau; however, the individual PMF determined for Clemenceau was similar to the combined PMF results for the same location.

As PMF is a tool often used for analysis for investigating sources of both particulate matter and gases, investigating potential sources of uncertainty in this tool is of value for the community of ACP. This paper could potentially also be published in AMT, as it is about the technique of PMF. Either way, the following comments need to be addressed prior to publication.

We thank the reviewer for her/his attention to our manuscript and positive comments.

### Minor

- 1) It was not clear until looking at the figure what orifice was used for both ACSMs to know what diameter cut-off the measurements correspond to (e.g., PM<sub>1</sub> vs PM<sub>2.5</sub>).

We specified this now in the main text, section 2.2: “During winter 2019/2020, the chemical composition of NR-PM<sub>1</sub> was investigated using two quadrupole ACSMs (Q-ACSM, Aerosol Chemical Speciation Monitor; Ng et al., (2011)) concomitantly at the Danube and Clemenceau stations. In this instrument, atmospheric particles are sampled at a flow rate of 3 L min<sup>-1</sup> (sampling line OD = 9.5 mm; ID = 6.5 mm; 2.2 m long stainless tube) with a cut-off at 2.5 μm

using a sampling head, then subsampled at a flow rate of around 85 cc min<sup>-1</sup> determined by a 100 µm critical aperture mounted at the instrument inlet equipped with PM<sub>1</sub> aerodynamic lens”.

- 2) How co-located were the AE33, Q-ACSM, and FIDAS 200? E.g., were they sampling from similar inlets for AE33 and Q-ACSM? Were the sampling heights similar for all three instruments? How close were the inlets for all three inlets?

Each instrument has its own distinct sampling line. We have added this information to the main text, section 2.2: “The three measurement instruments, AE33, ACSM, and FIDAS are located in the same station and therefore in exactly the same place. Their sampling lines are separate but only a few meters apart, in accordance with national guidelines, and are set at the same sampling height.”.

- 3) Was there a dryer for any of the instruments?

Yes, we have added this information to the main text as a supplement to comment 2 as well: “The ACSM and AE33 instruments were equipped with a dryer to maintain a relative humidity below 40 %”.

- 4) How statistically different are the average values shown in Table 1? There is discussion about the percent differences in the concentrations; however, the average values fall within the standard deviation, which is assumed to be the spread in the observations and not the uncertainty of the measurements?

We thank the reviewer for this comment. The standard deviation presented in Table 1 reflects the dispersion of observations and not measurement uncertainty. In order to assess the statistical significance of the differences between the average concentrations at the Danube and Clemenceau sites, we performed Welch's t-tests for each species. The tests show that the differences between the average concentrations are statistically significant ( $p < 0.05$ ) for all species (see table below).

| Specie | Average Clem. | Average Danube | p_value              |
|--------|---------------|----------------|----------------------|
| OA     | 4.38045892    | 3.98188878     | 0.00157018           |
| SO4    | 0.72440656    | 0.59962833     | 3.19E <sup>-07</sup> |
| NO3    | 2.31989462    | 1.83422787     | 1.74E <sup>-10</sup> |
| NH4    | 0.8939168     | 0.73731614     | 7.57E <sup>-08</sup> |
| Cl     | 0.04487007    | 0.08217552     | 2.42E <sup>-33</sup> |
| eBCff  | 0.83308443    | 0.75991424     | 0.00667625           |
| eBCwb  | 0.49663277    | 0.32052488     | 9.07E <sup>-33</sup> |

**Major**

- 1) Figure S3 does not make sense though it is needed, I believe, for the argument about potentially why the different ACSMs have different PMF results. How is it for both instruments and what is the average mass spectra being compared against? How does it impact total OA?

Figure S3 presents the difference between the mass spectra (normalized to total OA) of both ACSMs during two periods: Upper panel: during the pre-campaign intercomparison exercise in Metz-Borny; Lower panel: during concomitant measurements at both sites in Strasbourg.

- 2) Figure S6 & Figure 3. Total PM<sub>2.5</sub> is generally constant across an urban environment unless there is a very localized emission source, though that emission source maybe more impactful towards PM<sub>10</sub> and PM<sub>0.1</sub>. However, though the PM<sub>2.5</sub> (black line) looks generally similar between the two sites in Figure 3, there is very different slopes between the two ACSMs vs PM<sub>2.5</sub> in Figure S6 (also, unclear which value is slope vs intercept). What is potentially leading to these differences, and what does it mean for the quantification of one instrument vs another?

As now mentioned in the revised manuscript (thanks for the comment), the *a* values correspond to the y-intercept and the *b* values correspond to the slopes (0.62 for ACSM Danube and 0.75 for ACSM Clemenceau). The slopes are not very different for the two sites.

The value of the correlation slope  $\text{NR-PM}_1 + \text{eBC} = f(\text{PM}_{2.5})$  provides information on the accuracy of the absolute concentrations measured by the ACSM, whose values, once all technical validation steps have been completed, depend linearly on the ionization efficiency (IE) and the collection efficiency (CE). This value depends on the actual PM<sub>2.5</sub>/PM<sub>1</sub> ratio, which varies according to location and season.

- 3) The biggest concern and the least amount of discussion is with the combined PMF vs the individual PMF. From the discussion, it is not clear what is the "preferred," more accurate method? E.g., if there are multiple AMSs, ACSMs, or other measurements measuring the composition and concentration of PM, should they be combined into one dataset to conduct PMF for improved accuracy, or was the single PMF more accurate? Was whether one dataset was driving the results of the other dataset investigated? E.g., end points are determined, and then the results are determined from those end points. However, as the authors discuss, one location appeared to potentially have a mixed end-point as they called one of the results COA-like. Does it make sense for the Danube PMF results to have changed so much? I understand that this is a measurement report; however, the results of this paper has large implications for the general understanding and usage of PMF, particularly in how "certain" the results are and how to proceed when there are multiple measurements in one urban location. E.g., are there performance aspects or metrics that should be considered to determine if the PMF may be skewed due to unknown performance of one ACSM, especially if there are not multiple ACSMs to compare against or other external data to compare?

Following the comment #2 from Referee #1, We have added this paragraph in the conclusion part:

“In summary, the comparison of different PMF methods carried out in this study highlights caveats and limitations inherent to such kind of SA approach. First, the elucidation of OA sources based on factors derived from PMF should be interpreted with caution considering real-world. In addition, attention should be exercised when combining data from different measurement instruments, as they are not strictly identical in terms of sensitivity. However, positioning two instruments in the same location (or close to each other) can help to verify the presence of atypical or unique factors and explain discrepancies. These limitations introduce uncertainties in the apportionment of OA sources and in the consistency of factor interpretation. In order to improve the identification and interpretation of PMF factors, we propose the integration of complementary datasets (e.g., molecular tracers), which would provide additional constraints. Future work should include a focus on refined methodologies to better handle multi-instrument and multi-timescale datasets, and on the elaboration of standardized protocols for inter-instrument comparisons. Ultimately, improving these methods will lead to a better understanding of the sources, evolution, and role of OA in the atmosphere, which is crucial for accurately assessing their impacts on air quality, health, and climate.”
